# Supplementary material for: Facile morphology-controllable hydrothermal synthesis and color tunable luminescence properties of NaGd(MoO4)2:Eu3+,Tb3+microcrystals
Source: Royal Society of Chemistry journal article supplement (doi:10.1039/c5ra06221g), 2015-01-01
Supplement: c5ra06221g1.pdf [file c5ra06221g1.pdf]

## Supplementary Information

### Facile Morphology-controllable Hydrothermal Synthesis and Color Tunable Luminescence Properties of $\text{NaGd}(\text{MoO}_4)_2: \text{Eu}^{3+}, \text{Tb}^{3+}$ Microcrystals

Anming Li,<sup>a,b</sup> Dekang Xu,<sup>a</sup> Hao Lin,<sup>a</sup> Shenghong Yang,<sup>a</sup> Yuanzhi Shao,<sup>a</sup> Yueli Zhang,<sup>\*a</sup> and Zhenqiang Chen<sup>b</sup>

<sup>a</sup> State Key laboratory of Optoelectronic Materials and Technologies, School of Physics and Engineering, Sun Yat-sen University, Guangzhou 510275, China.

E-mail: stszyl@mail.sysu.edu.cn

<sup>b</sup> Institute of Optoelectronic Engineering, Jinan University, Guangzhou 510632, China

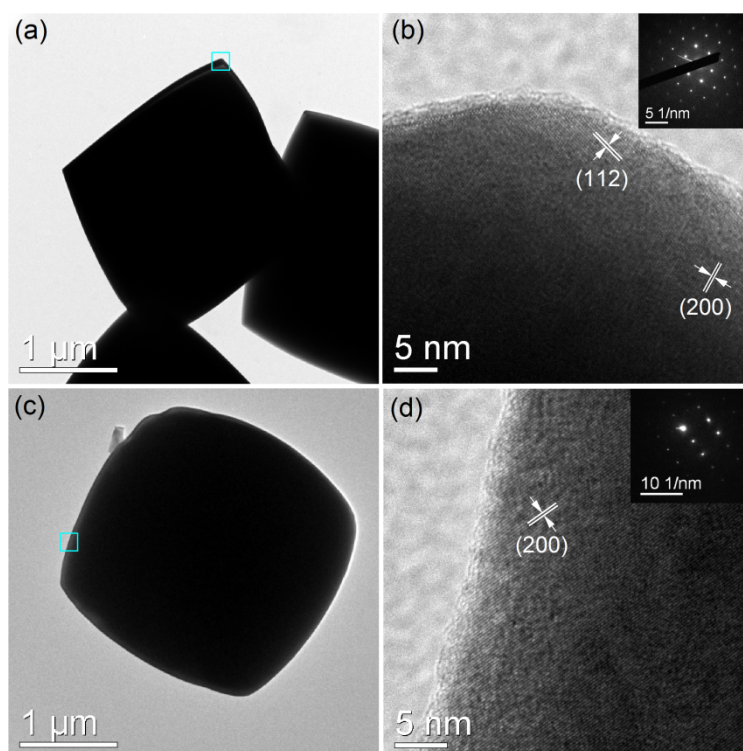

**Fig. S1** TEM images, HRTEM images and SAED patterns of  $\text{NaGd}(\text{MoO}_4)_2$  samples with the morphology of bipyramids and tetragonal plates: (a) and (b) bipyramids, (c) and (d) tetragonal plates.

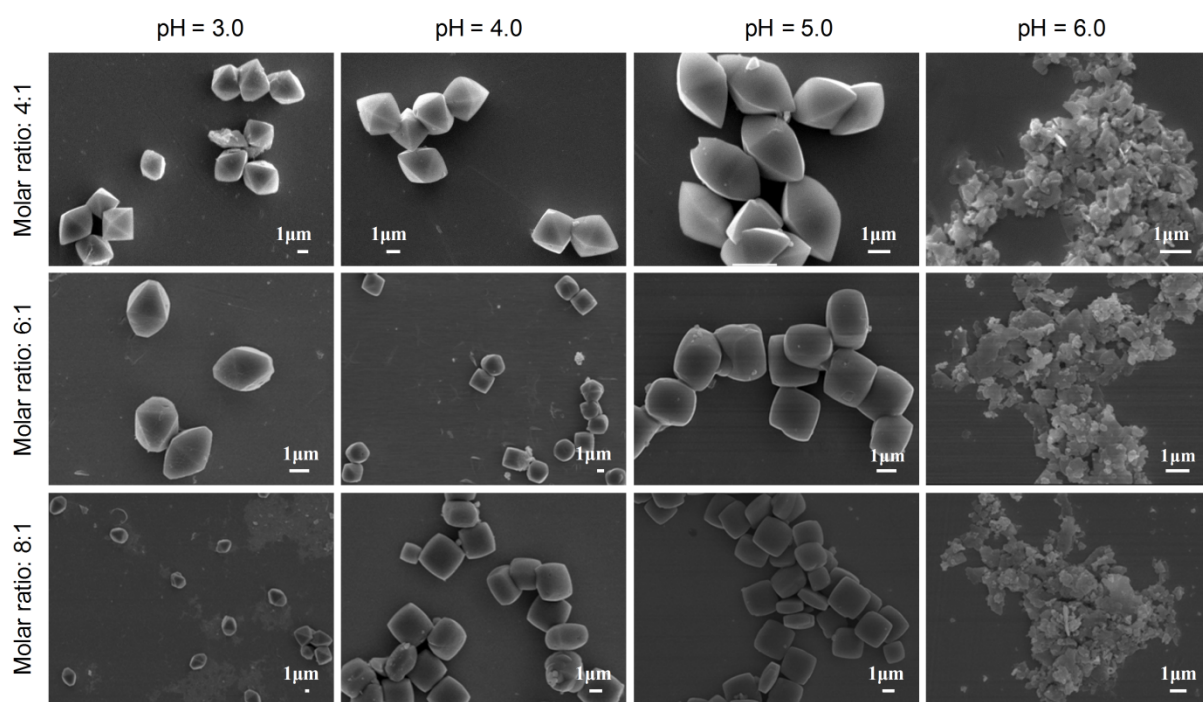

**Fig. S2** SEM images of the  $\text{NaGd}(\text{MoO}_4)_2$  samples synthesized at different  $\text{Na}_2\text{MoO}_4/\text{Re}(\text{NO}_3)_3$  molar ratios (4:1, 6:1 and 8:1) and different pH values (pH = 3.0, 4.0, 5.0 and 6.0).

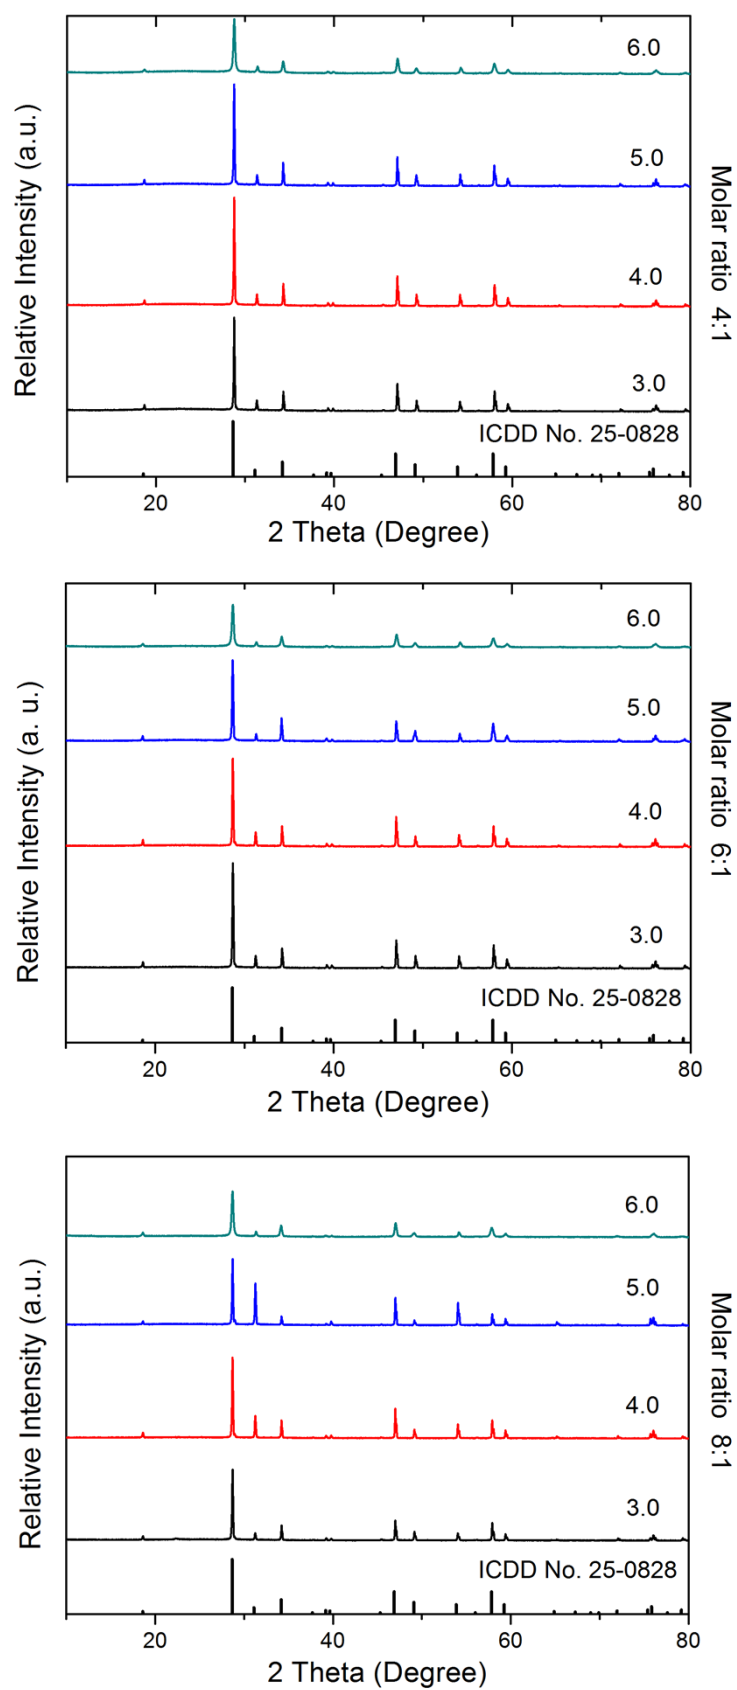

**Fig. S3** XRD patterns of the  $\text{NaGd}(\text{MoO}_4)_2$  samples synthesized at different  $\text{Na}_2\text{MoO}_4/\text{Re}(\text{NO}_3)_3$  molar ratios (4:1, 6:1 and 8:1) and different pH values (pH = 3.0, 4.0, 5.0 and 6.0).

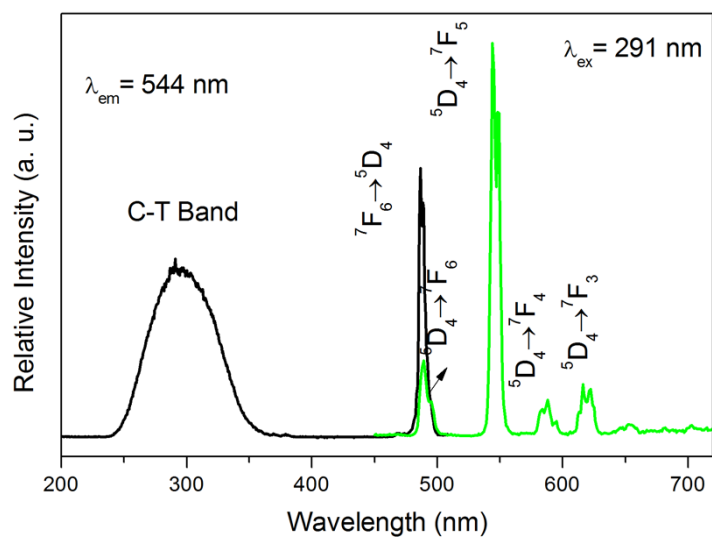

**Fig. S4** Excitation and emission spectra of NaGd(MoO<sub>4</sub>)<sub>2</sub>: 5% Tb<sup>3+</sup> microplates.

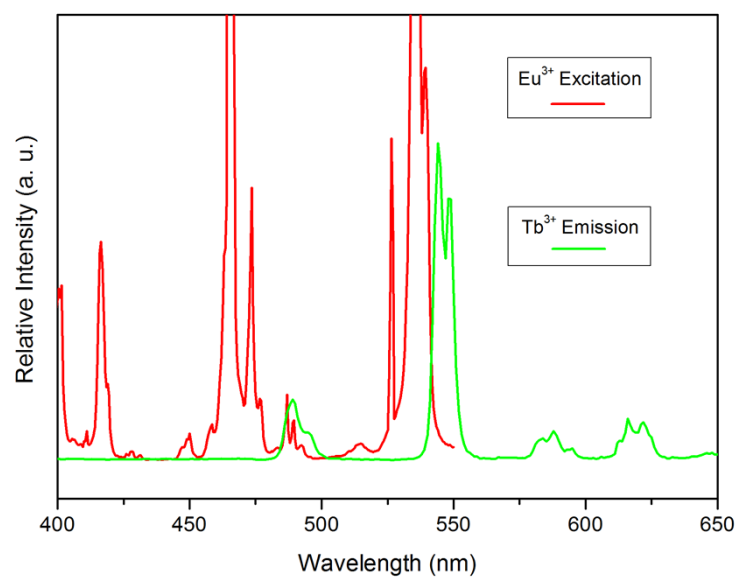

**Fig. S5** Spectral overlaps between emission spectrum of NaGd(MoO<sub>4</sub>)<sub>2</sub>: Tb<sup>3+</sup> and excitation spectrum of NaGd(MoO<sub>4</sub>)<sub>2</sub>: Eu<sup>3+</sup>.

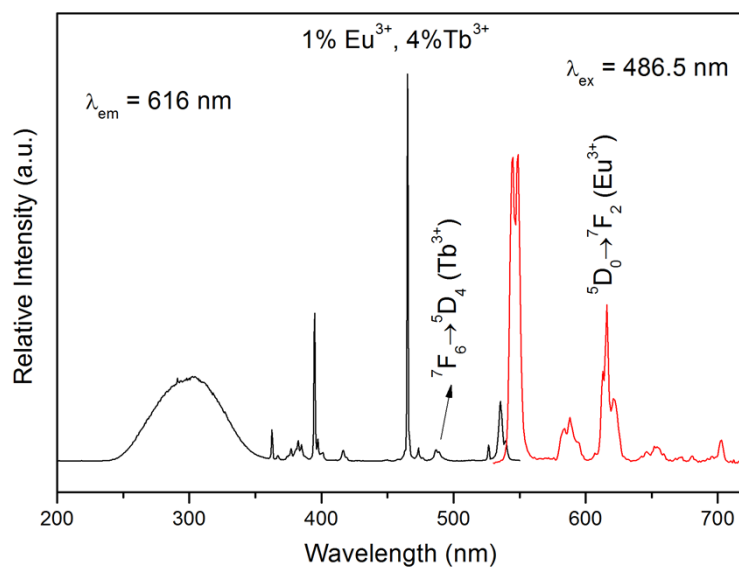

**Fig. S6** Excitation and emission spectra of NaGd(MoO<sub>4</sub>)<sub>2</sub>: 1% Eu<sup>3+</sup>, 4% Tb<sup>3+</sup> microplates.

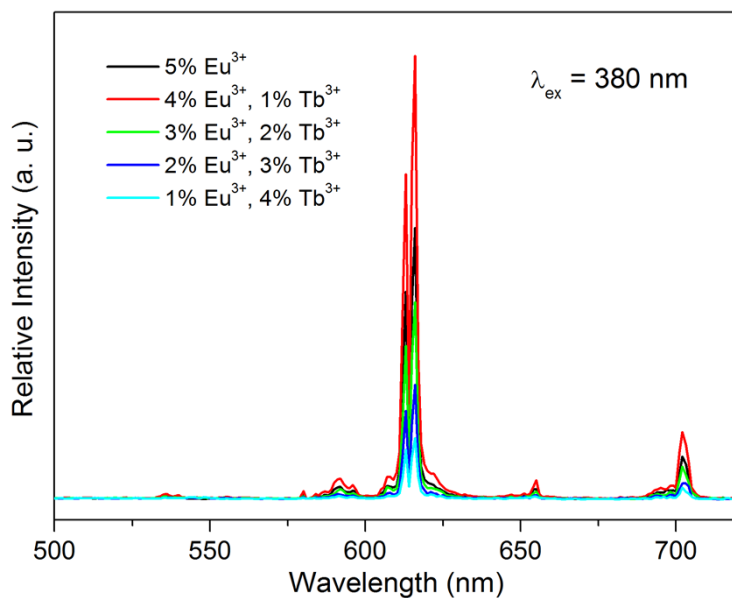

**Fig. S7** Emission spectra of NaGd(MoO<sub>4</sub>)<sub>2</sub>: Eu<sup>3+</sup>, Tb<sup>3+</sup> microplates with different doping concentrations excited by near-UV light at 380 nm.
